# Supplementary material
Source: PubMed Central journal article supplement (PMC3165784)
Supplement: supp_85_17_8954__1.pdf [file supp_85_17_8954__1.pdf]

**Fig. S1. Amino acid sequence alignment of 16 VRC1-resistant viruses.** The VRC01-sensitive HXBc2 and JRCSF gp120 virus envelope sequences are shown as references. In addition, the HXBc2 and 93TH057 core protein sequences are shown, as these proteins were used to solve the liganded crystal structures of b12 and VRC01, respectively. The gp120 contacts with VRC01, CD4, or b12 are indicated in blue, gold, or green, respectively. Open circles (○) denote gp120 main-chain-only contacts, open circles with rays (☼) denote gp120-side-chain-only contacts, and filled circles (●) denote both main-chain and side-chain contacts. Residues that vary from the reference sequence are highlighted in yellow. Residues that showed a significant change in VRC01 binding when mutated are shown in bold; the residue is underlined if the mutant virus displayed neutralization resistance to VRC01. Variations within the CD4 binding loop and its proximal region that contains the NXS/T motif resulting in additional N-glycosylation sites are highlighted in blue.



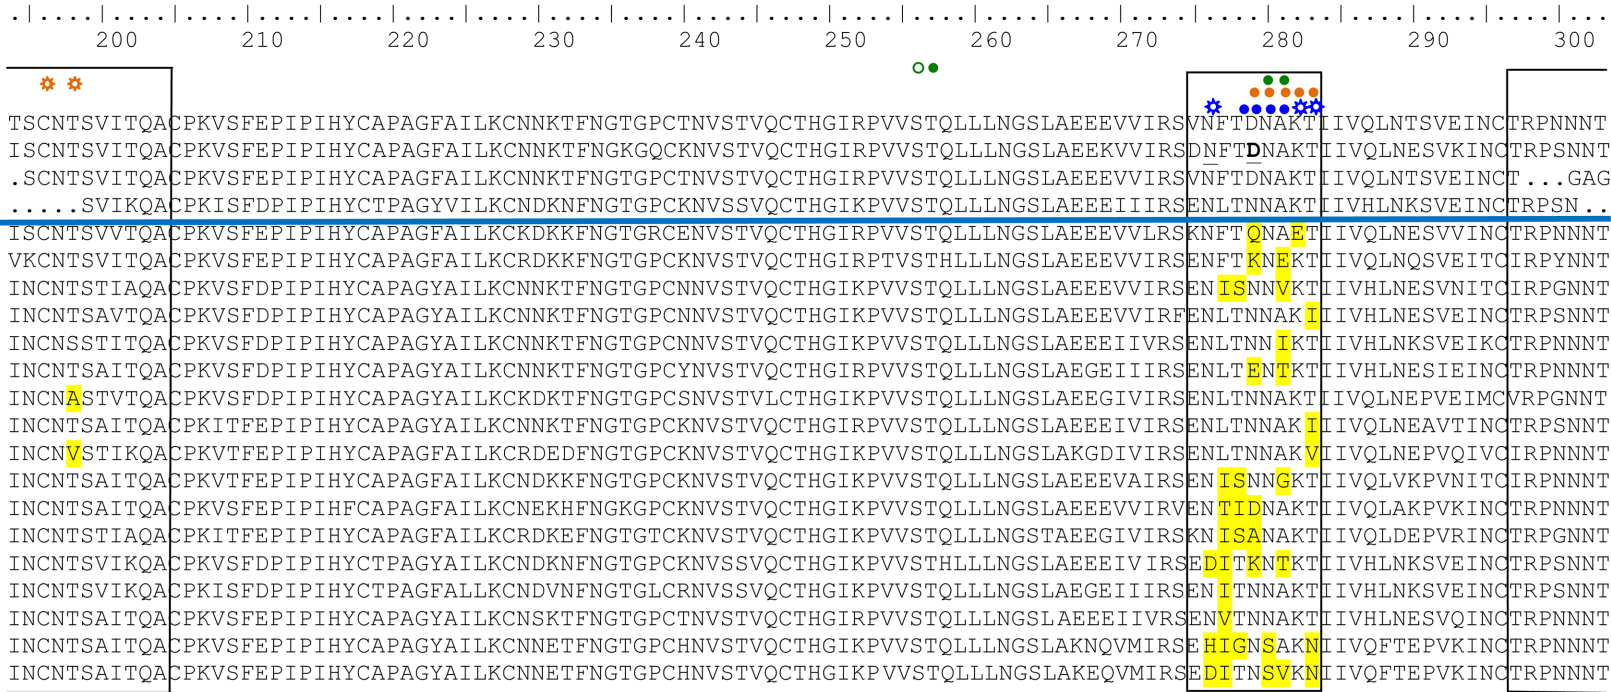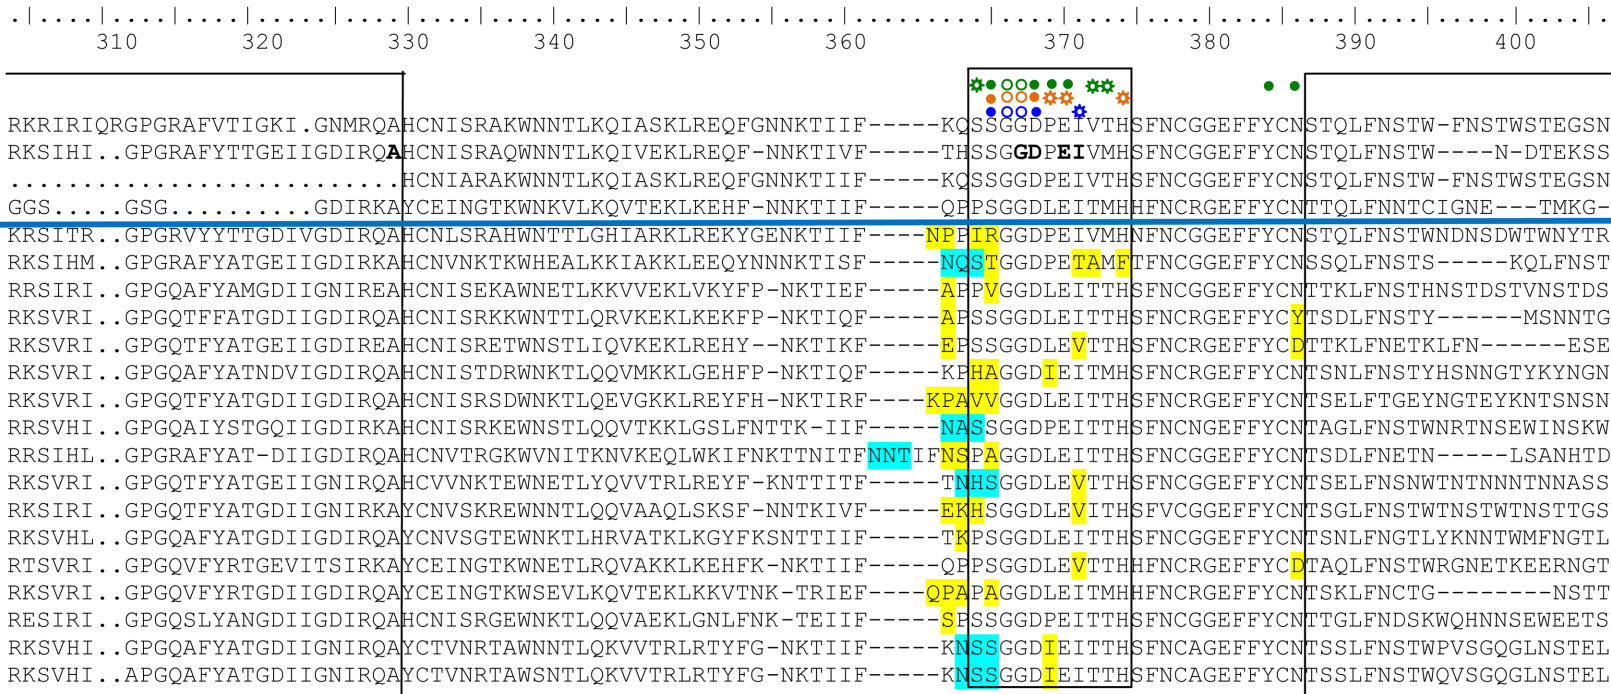

V2

Loop D

V3

V3

CD4 Binding Loop

V4

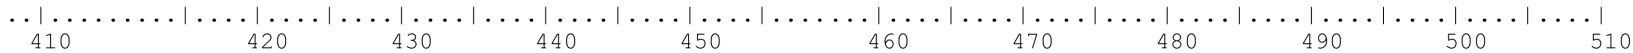

|                  |                                                                                                                    |
|------------------|--------------------------------------------------------------------------------------------------------------------|
| HXB2R-K03455     | TEG-----SDTITLPCRIKQIINMWQKVGKAMYAPPISGQIRCSSNITGLLLTRDGG---NSNNESEIEIFRPGGGDMRDNWRSELYKYKVKVIEPLGVAPTAKARRVQREKR  |
| JR_CSF           | TEG-----NDTIILPCRIKQIINMWQEVGKAMYAPPKQIRCSSNITGLLLTRDGG---KNESEIEIFRPGGGDMRDNWRSELYKYKVKVIEPLGVAPTAKARRVQREKR      |
| HXBc2 Core       | TEG-----SDTITLPCRIKQIINMWQKVGKAMYAPPISGQIRCSSNITGLLLTRDGG---NSNNESEIEIFRPGGGDMRDNWRSELYKYKVKVIE.....               |
| 93TH057 Core     | -----CNGTITLPCRIKQIINMWQGTQAMYAPPIDGKINCVSNITGILLTRDGG---ANNTSNETFRRPGGGNIKDNWRSELYKYKVVQIE.....                   |
| AY124970_BL01    | TYNP----NDTITLPCRIKQIINLWQKVGKAMYAPPVIRGQIRCSSNITGLLLTRDGGK---NGTEGTEIEIFRPGGNMRDNWRSELYKYKVKVIEPLGVAPTAKARRVQREKR |
| EF210732_H086_8  | NNT-----NANIELPCRIQIVNMWQRIGKAMYAPPISGQINCTSNTGLLLTRDGG---KNNKSTEVFRPIGGEMRDNWRSELYKYKVVQIEPLGVAPTAKARRVQREKR      |
| CAP210_2_00_E8   | AETG---NSTNTNITLPCRIQIINMWQEVGRAMYAPPISGQINCTSNTGLLLTRDGGENKTE NNDEIFRPGGGDMKDNWRSELYKYKVVIEKPLGVAPTAKARRVQREKR    |
| Du172_17         | -----ANITLQCRIKQIINMWQGVQAMYAPPVIRGQIRCSSNITGLLLTRDGG---KEKNDTETFRRPGGGDMRDNWRSELYKYKVVIEKPLGIAPDKARRVQREKR        |
| Du422_1          | VDN-----KTIIILPCRIKQIINMWQEVGRAMYAPPVIRGQIRCSSNITGLLLTRDGG---ENSTEGVFRPGGGDMKDNWRSELYKYKVVIEKPLGVAPTAKARRVQREKR    |
| TV1_29           | S-----LPITLQCRIKQIVRMWQGVQAMYAPPVIRGQIRCSSNITGLLLTRDGG---FNNTTNETFRPGGGDMRDNWRSELYKYKVVIEKPLGIAPTAKARRVQREKR       |
| TZA125_17        | -----NITLPCRIKQIVNMWQEVGRAMYAPPVIRGQIRCSSNITGLLLTRDGG---NNTNGTETFRRPGGGDMRDNWRSELYKYKVVIEKPLGIAPTAKARRVQREKR       |
| 57128_02         | NKTE----DVNITLQCRIKQIINMWQGVGKAMYAPPVIRGQIRCSSNITGLLLTRDGGGA---DNNRQNETFRPGGGDMRDNWRSELYKYKVVIEKPLGIAPTAKARRVQREKR |
| EU885764_x2088_9 | N-----ENITLQCRIKQIVRMWQEVGQAMYAPPVIRGQIRCSSNITGLLLTRDGGVN---DTHDKENETFRTGGDMRDNWRSELYKYKVKVIEKPLGVAPTARRRRVQREKR   |
| 242_14           | ANG-----NITLTCKIKQIINMWQVVGQAMYAPPVIRGQIRCSSNITGLLLTRDGGFRNDTNETYEAFRPGGGDMRDNWRSELYKYKVKVIEPLGVAPTHAKARRVQREKR    |
| T250_4           | GTES----NDTITLQCEIKQFINMWQVGRAMYAPPVIRGQIRCSSNITGLLLTRDGGP---NSTQNETFRPGGGDMRDNWRSELYKYKVVQIEPLGVAPTAKARRVQREKR    |
| T278_50          | NNTNESSTSGTITIKCRIKQIINMWQIVGQAMYAPPVIRGQIRCSSNITGLLLTRDGGEG---DEKANETFRTGGDMRDNWRSELYKYKVKVIEPLGVAPTAKARRVQREKR   |
| 620345_C1        | N-----DIIILPCRIKQIVRMWQGVQSMYAPPVIRGQIRCSSNITGLLLTRDGGD---GPTADNETFRPAGGDMRDNWRSELYKYKVVQIEPLGIAPTAKARRVQREKR      |
| CNE28            | CNG-----TIILPCRIKQIINMWQEVGQAMYAPPISGQIRCSSNITGILLTRDGGAN---SSQSNEIFRPGGGDMKDNWRSELYKYKVVQIEPLGVAPTAKARRVQREKR     |
| 3817_V2_C59      | RMNS---PEANITLQCRIKQIVNMWQVGRAMYAPPVIRGQIRCSSNITGLLLTRDGG---LNTSNNETFRPGGGDMRDNWRSELYKYKVVQIEPLGLAPTAKARRVQREKR    |
| 6540_V4_C1       | -----DTITLQCRIKQIINMWQRAAQAIYAPPVIRGQIRCSSNITGLLITSDYG---NNNSDNEIFRRTGGDMRDNWRSELYKYKVKVIEPIGVAPTAKARRVQREKR       |
| 6545_V4_C1       | -----DTITLQCRIKQIINMWQRAAQAIYAPPVIRGQIRCSSNITGLLITSDYG---NRSSDNETFRRTGGDMRDNWRSELYKYKVKVIEPIGVAPTAKARRVQREKR       |

V4

β20 / β21

V5 / β24

β24 / α5  
Connection
